# Supplementary material
Source: Springer Nature journal article supplement (https://www.springermedizin.de/resource/supplementary/12955_2011_960_MOESM1_ESM.pdf/9558784)
Supplement: MOESM1 [file 9558784]

Population 1983  
*N=1423*

POPS cohort 1983  
*N=1338 (94%)*

Non-participation  
*N=85*

POPS14

POPS19

Dead *N=376*

Dead *N=379*

Non-participation  
*N=118*

Non-participation  
*N=275*

Responders  
*N=844*

Responders  
*N=684*

Responders POPS 14 and 19  
*N=630*
